# Supplementary material for: Amphiphilic Janus nanosheets by grafting reactive rubber brushes for reinforced rubber materials
Source: Royal Society of Chemistry journal article supplement (doi:10.1039/c9py00863b), 2019-01-01
Supplement: c9py00863b1.pdf [file c9py00863b1.pdf]

## Supporting Information

# Amphiphilic Janus nanosheets by grafting reactive rubber brushes for reinforced rubber materials

Xiao Han, Xincheng Liang, Lei Cai, Aihua He\*, Huarong Nie\*

Shandong Provincial Key Laboratory of Olefin Catalysis and Polymerization, Key Laboratory of Rubber-Plastics (Ministry of Education), School of Polymer Science and Engineering, Qingdao University of Science and Technology, Qingdao 266042, China.

E-mail address of corresponding author: niehr@iccas.ac.cn; aihuahe@iccas.ac.cn

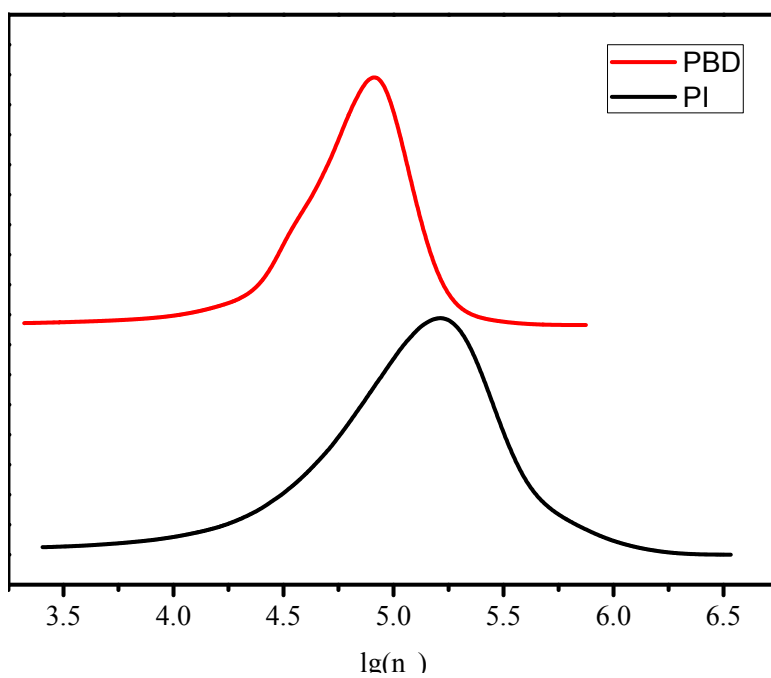

**Fig. S1** GPC images of PI and PBd chains grafted on the Janus sheets.

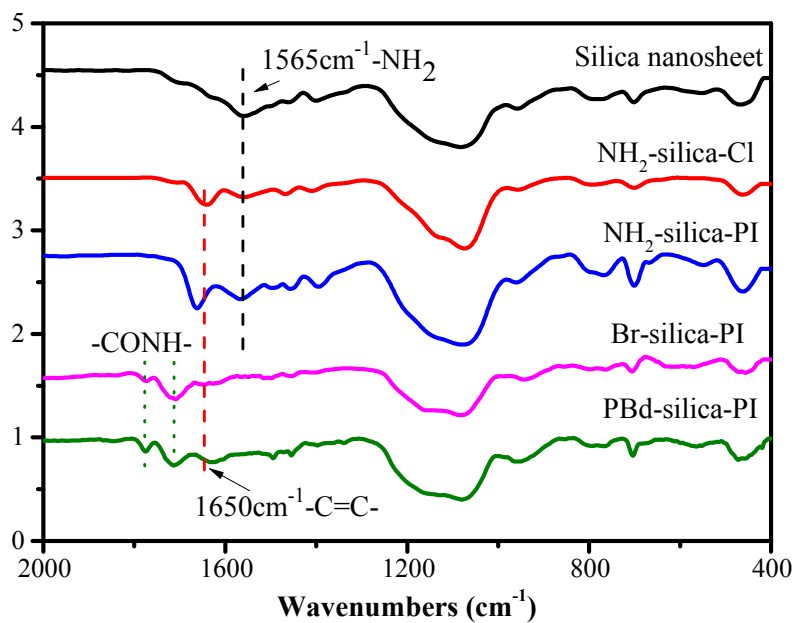

**Fig. S2** FTIR spectra of silica nanosheets before and after the attachment of polymer brushes.

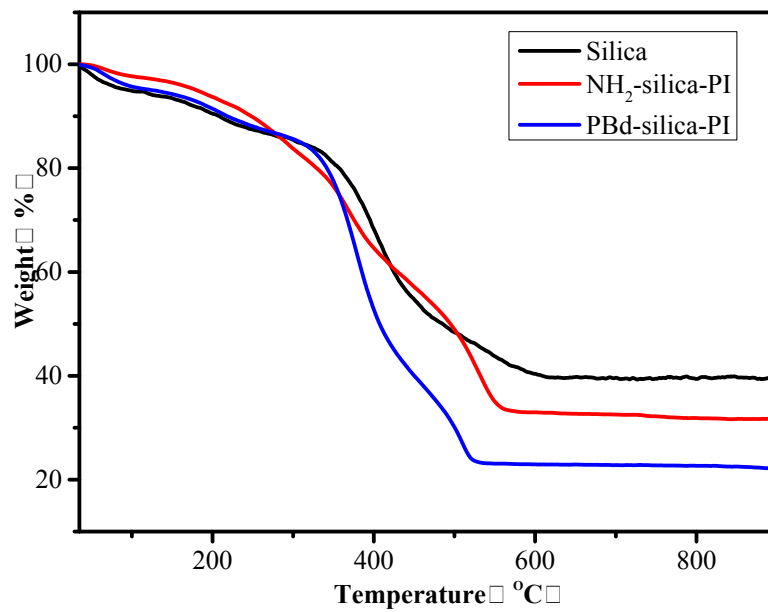

**Fig. S3** Thermogravimetric analysis of silica nanosheets, NH<sub>2</sub>-silica-PI nanosheets, and PBd-silica-PI Janus nanosheets.

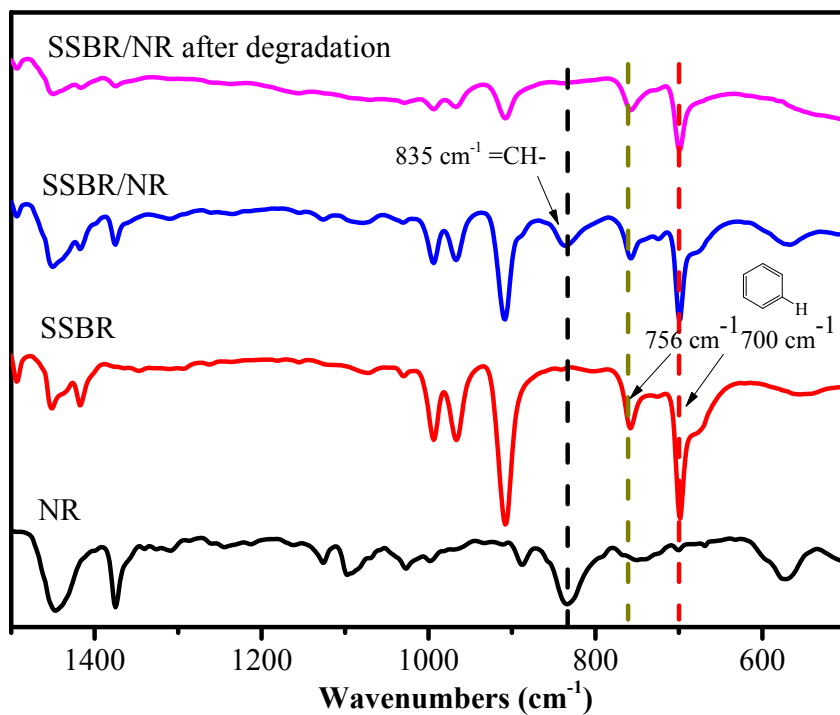

**Fig. S4** FTIR spectra of rubber materials before and after degradation by exposure to air at 250 °C for 5 min.
